# Supplementary material for: Sorting of a multi-subunit ubiquitin ligase complex in the endolysosome system
Source: eLife. 2018 Jan 22;7:e33116. doi: 10.7554/eLife.33116 (PMC5811209; doi:10.7554/eLife.33116)
Supplement: Figure 3—source data 1. [file elife-33116-fig3-data1.xlsx]

## Sheet: Sheet1
FM4-64
		# of Green Puncta
Colocalized with	File name	Cell#1	Cell#2	Cell#3	Cell#4	Cell#5	Cell#6	Cell#7	Cell#8	Cell#9	Cell#10	Cell#11	Cell#12	Cell#13	Cell#14	Cell#15	Cell#16	Cell#17	Cell#18	Cell#19	Cell#20	Cell#21	Cell#22	Cell#23	Cell#24	Cell#25	Cell#26	Cell#27	Cell#28	Cell#29	Cell#30	Cell#31	Cell#32	Cell#33	Total # of puncta	Total # of cells
109w-NG	109w-NG_FM464_0minschase_8planes_001_R3D_D3D	5	9	0	3	3	6	2	4	5	3	6	4	3	3	3	2	2	6	1	3	3	1	2	3										82	24
109w-NG	109w-NG_FM464_0minschase_8planes_002_R3D_D3D	s	5	2	2	5	4	s	5	s	1	4	4	6	3	2	4	1	0	2	s	6	7	2	1	4	s	4	5						79	23
109w-NG	109w-NG_FM464_0minschase_8planes_003_R3D_D3D	6	s	s	4	5	3	3	4	s	5	2	4	7	s	2	4	4	4	1	s	5	s	2	s	3	2	2	s	4	4	2	s	0	82	24
109w-NG	109w-NG_FM464_0minschase_8planes_004_R3D_D3D	7	4	4	5	5	4	9	7	1	3	4	4	0	1	6	1	0	5	5	3	2	2	5	5										92	24
109w-NG	109w-NG_FM464_0minschase_8planes_005_R3D_D3D	4	4	5	4	7	1	1	5	8	6	6	0	10	6	5	s	s																	72	15
																																		TOTAL	407	110
"s" stands for small cells, and we did not count the punctae in small cells																																		MEAN	3.7	MEDIAN	4
# of punctae	# of cells	Percentage
0	6	6.47059
1	11	11.8627
2	17	18.3333
3	15	16.1765
4	24	25.8824
5	18	19.4118
6	10	10.7843
7	5	5.39216
8	1	1.07843
9	2	2.15686
10	1	1.07843
