# Supplementary material for: Sorting of a multi-subunit ubiquitin ligase complex in the endolysosome system
Source: eLife. 2018 Jan 22;7:e33116. doi: 10.7554/eLife.33116 (PMC5811209; doi:10.7554/eLife.33116)
Supplement: Figure 3—source data 2. [file elife-33116-fig3-data2.xlsx]

## Sheet: % Colocalization
Strain	File name	# Cells	Total # of green puncta	# green puncta not colocalized with red	# puncta localized with red	Percentage
109w-NG; Sec7-Mars	109w-NG_Mars-Sec7_001_R3D_D3D	11	44	26	18	40.9091
109w-NG; Sec7-Mars	109w-NG_Mars-Sec7_002_R3D_D3D	10	45	39	6	13.3333
109w-NG; Sec7-Mars	109w-NG_Mars-Sec7_003_R3D_D3D	9	40	21	19	47.5
109w-NG; Sec7-Mars	109w-NG_Mars-Sec7_004_R3D_D3D	11	50	36	14	28
109w-NG; Sec7-Mars	109w-NG_Mars-Sec7_005_R3D_D3D	8	29	16	13	44.8276
109w-NG; Sec7-Mars	109w-NG_Mars-Sec7_006_R3D_D3D	13	57	35	22	38.5965
109w-NG; Sec7-Mars	109w-NG_Mars-Sec7_007_R3D_D3D	11	58	38	20	34.4828
109w-NG; Sec7-Mars	109w-NG_Mars-Sec7_008_R3D_D3D	10	49	35	14	28.5714
109w-NG; Sec7-Mars	109w-NG_Mars-Sec7_009_R3D_D3D	7	23	9	14	60.8696
109w-NG; Sec7-Mars	109w-NG_Mars-Sec7_010_R3D_D3D	10	67	45	22	32.8358
TOTAL		100	462		AVERAGE	36.9926	STDEV	12.8881	SEM	4.07558
109w-NG	109w-NG_FM464_0minschase_8planes_001_R3D_D3D	28	62	24	38	61.2903
109w-NG	109w-NG_FM464_0minschase_8planes_002_R3D_D3D	28	95	33	62	65.2632
109w-NG	109w-NG_FM464_0minschase_8planes_003_R3D_D3D	30	90	34	56	62.2222
109w-NG	109w-NG_FM464_0minschase_8planes_004_R3D_D3D	24	66	44	22	33.3333
109w-NG	109w-NG_FM464_0minschase_8planes_005_R3D_D3D	17	72	27	45	62.5
	TOTAL	127	385		AVERAGE	56.9218	STDEV	13.2692	SEM	5.93418
