# Supplementary material for: Sorting of a multi-subunit ubiquitin ligase complex in the endolysosome system
Source: eLife journal article supplement (doi:10.7554/elife.33116), 2018-01-22
Supplement: supp [file elife_poa_e33116_Figure_2_figure_supplement_1.pdf › elife_poa_e33116_Figure_2_figure_supplement_1.pdf]

**A**

Yir014W:

17 unique peptides, 113/242 amino acids (47% coverage)

**MLHLEDDNGRQ**RSVIANLQ**KFVYCCLYLRF**IKDGSFLFLILLGWI**ISSLCDFIQELTLRYL**  
**KKNYLEVGRDNDQEDDES**LAIR**GLETPIVR**MIINKAIRYYQGLILLETAYCIVYHIRLDV  
 SRDICKSPYGFVIMLLIRE**EFTCPVPTAFPSK**LLVLLDILLLLFCQIVIINGSLSSSLQNV  
 KLIVKELNAEEEGALNILKLNTWHMDATGPELIVLKNHDKS**IPQQADGDDATEITPLLNIAE**

**B**

Yir109W:

28 unique peptides, 181/294 amino acids (62% coverage)

**MDNFESTAEGNLSIGNKRVYELR**KRNFQORNLVNNLSFLGYVLISLEYIKYDR**TVWTLI-**  
**TRAI**VQSLISS**PFPSDAKLRL**ATLGADNNTTG**VATLP**GGRSIR**FPGMFGTEMLYNSSSE**  
**AEQQDHDDTAIVSMKKQ**IRKFLFHGCLSLNMLFIIL**TILFPIDFF**EPLSGSEP**VDDGPKN**  
**TSPFSNSDGLLLGERRGGLFLQ**MIGER**LPKSNFSGNLGLVMFEFSILIVQFTLFS**LCV  
**VLADLDFE**EPER**LEPVNSDGYDGS**VIVARI**PLNK**TMNAILNDGNINDNNENASNSV

**C**

|         |                                                                               |
|---------|-------------------------------------------------------------------------------|
| Yir014W | -----MLHLEDDNGRQRSVIANLQKFVYCCLYLRFIKDGSFL-ILL                                |
| Ypr109W | MDNFESTAEGNLSIGNKRVYELR-KRNFQORNLVNNLSFLGYVLISLEYIKYDRTVWTLIT                 |
|         | : .*. ... **.: **.: * : *.:** . . .:                                          |
| Yir014W | GWIISSLC--DFIQELTLRYLKKNYLEVGRD-----                                          |
| Ypr109W | RAIVQSLISSPFPSDAKLRR---LATLGADNNTTG <b>VATLP</b> GGRSIR <b>FPGMFGTEMLYN</b> S |
|         | *.:** * .: .** :* **                                                          |
| Yir014W | ----DQEDDES <b>LAIRGLETPIVR</b> MIINKAIRYYQGLILLETAYCIVYHIRLDVSRDIC--         |
| Ypr109W | SSEAEQQDHDDTAIVSMKKQIRKFLFHGCLSLNMLFIIL <b>TILFPIDFF</b> EPLSGSEP <b>VDDG</b> |
|         | :*:*. . . ** . . . * : : : : .: :*: * : * . . *. * .:                         |
| Yir014W | ----SKPYGFVIMLLIRE-----FTCPV-PTAFPSKLLLVLLDILLLLFCQIVIING                     |
| Ypr109W | PKNT <b>TSPFSNSDGLLLGERRGGLFLQ</b> MIGER <b>LPKSNFSGNLGLVMFEFSILIVQFTLFS-</b> |
|         | .*: . ** : * : : : * .: * ** : : : :*: * : : .:                               |
| Yir014W | SLSSSLQNVKLIVKELNAEEEGALNILKLNTWHMDATGPELIVLKNHDKS <b>IPQQADGDDA</b>          |
| Ypr109W | -----LT--CVVLADLDFEEPE-----RLEPVNSDGYDG                                       |
|         | * : : :*: ** : * :*:** *                                                      |
| Yir014W | TEITPLLNIAE-----                                                              |
| Ypr109W | SVIVARIPLNKTMNAILNDGNINDNNENASNSV                                             |

Figure 2-figure supplement 1
