# Supplementary figures and images for: Sorting of a multi-subunit ubiquitin ligase complex in the endolysosome system
Source: eLife journal article supplement (doi:10.7554/elife.33116), 2018-01-22

**A**

Gld1 competes with Vld1 for Ubx3-nG localization

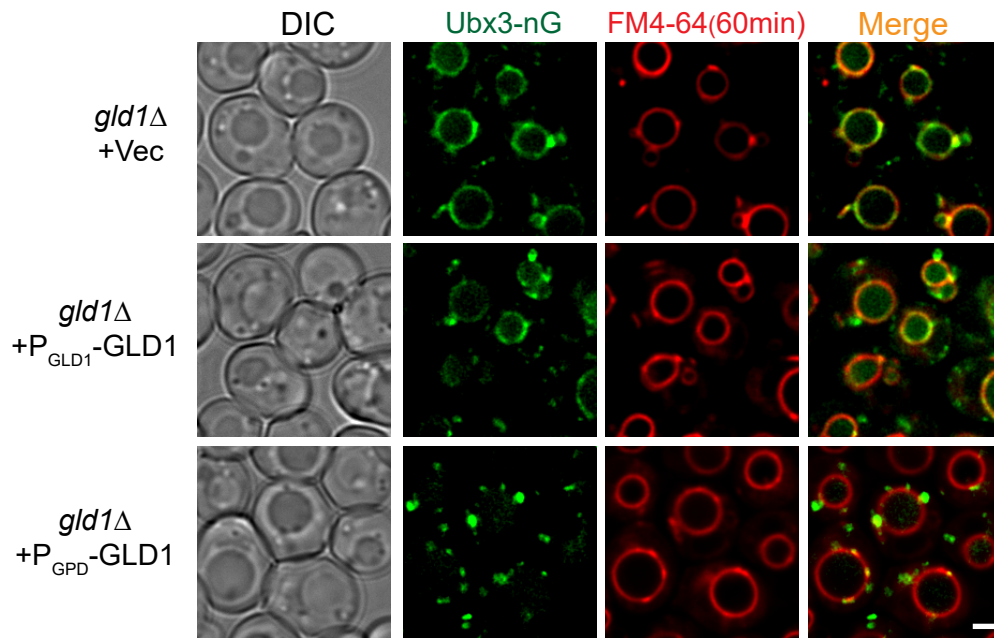**B**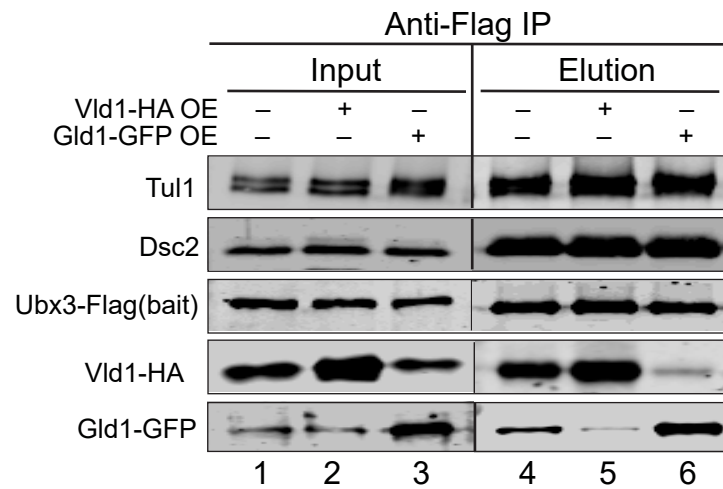

Figure4-figure supplement 1

Supplement: supp [file elife_poa_e33116_Figure_4_figure_supplement_1.pdf › elife_poa_e33116_Figure_4_figure_supplement_1.pdf]

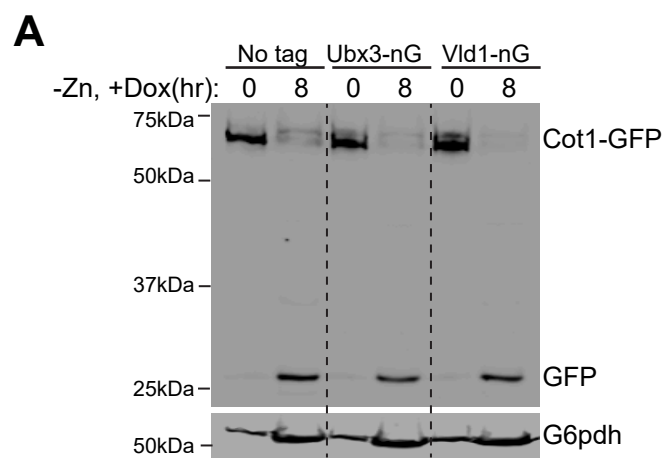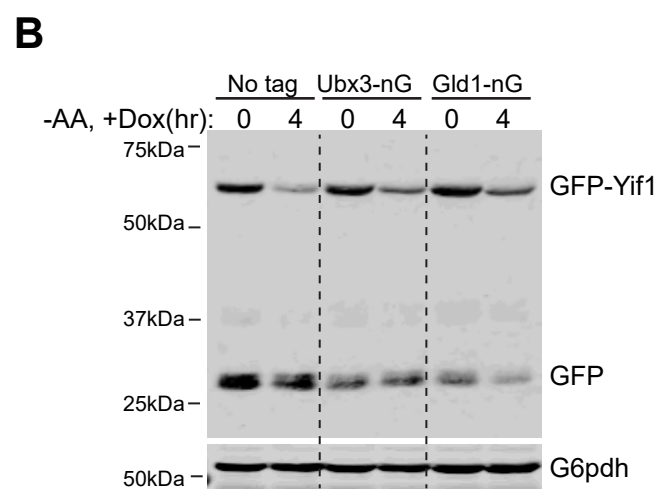

Figure 6-figure supplement 1

Supplement: supp [file elife_poa_e33116_Figure_6_figure_supplement_1.pdf › elife_poa_e33116_Figure_6_figure_supplement_1.pdf]

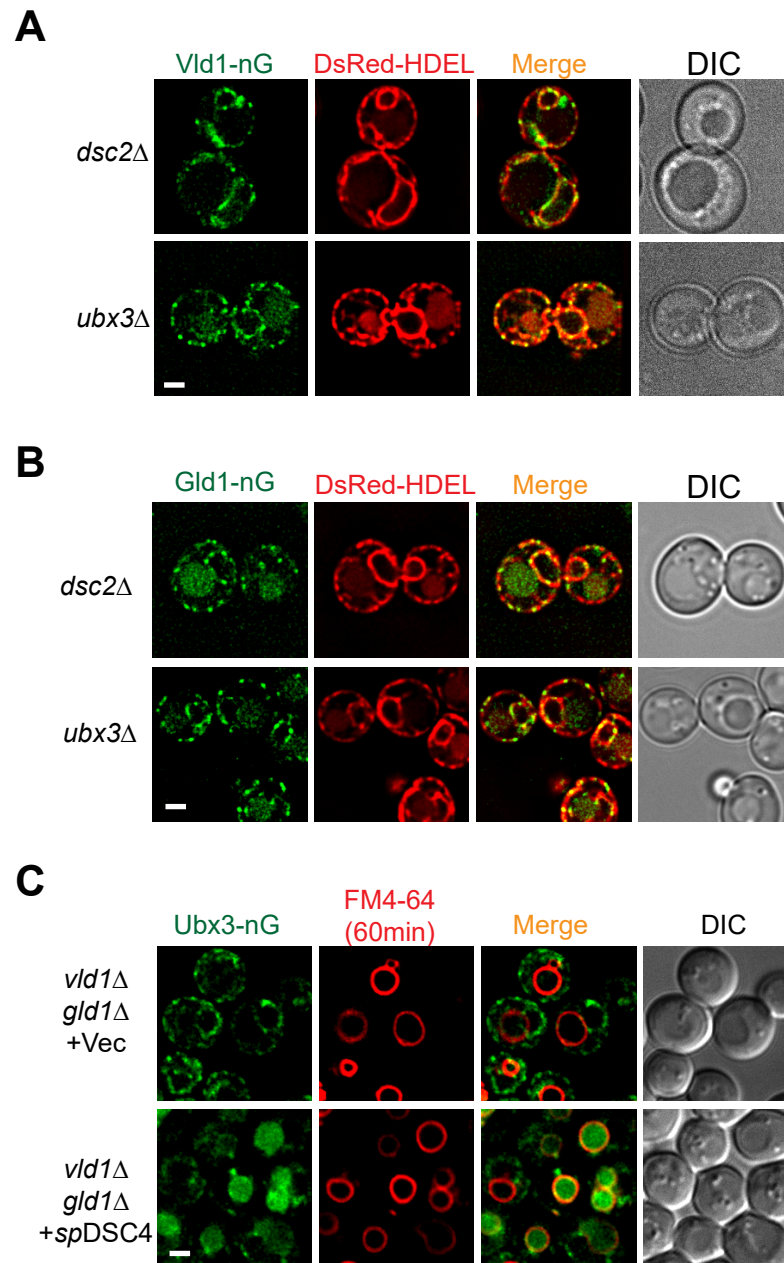

Figure 6-figure supplement 2

Supplement: supp [file elife_poa_e33116_Figure_6_figure_supplement_2.pdf › elife_poa_e33116_Figure_6_figure_supplement_2.pdf]
